# Supplementary material
Source: PubMed Central journal article supplement (PMC3383017)

## Legends to Supplemental Figures

**Supplemental Figure 1: Combined treatment with sorafenib and obatoclax kills human leukemia cells through a caspase-dependent mechanism and markedly reduces their viability.** (A) U937 cells were exposed to sorafenib (7.5  $\mu\text{M}$ ) and obatoclax (1.5  $\mu\text{M}$ ) alone or in combination for 30 h after which loss of mitochondrial membrane potential was assessed by monitoring DiOC<sub>6</sub> uptake. \* = significantly greater than values for obatoclax or sorafenib alone;  $P < 0.01$ . (B) U937 cells were exposed to 7.5  $\mu\text{M}$  sorafenib  $\pm$  1.5  $\mu\text{M}$  obatoclax in the presence or absence of the pan-caspase inhibitor Q-VD-OPH (Ci; 15  $\mu\text{M}$ ) for 48 h, after which the percentage of dead cells was determined using the 7-AAD assay. \* = significantly less than values for Sor/Ob-treated cells;  $P < 0.01$ . (C) U937 cells were treated with sorafenib (7.5  $\mu\text{M}$ )  $\pm$  obatoclax (1.5  $\mu\text{M}$ ) for 48 h, after which cell growth and viability was assessed by the CellTiter-Glo® Luminescent Assay (Promega).

**Supplemental Figure 2: Combined exposure of human leukemia cells to sorafenib and HA14-1 results in the pronounced induction of cell death in association with marked mitochondrial injury and caspase activation.** (A) U937 cells were exposed to 7.5  $\mu\text{M}$  sorafenib, 10  $\mu\text{M}$  HA14-1 alone or in combination for 24 h after which the percentage of apoptotic cells was determined using the Annexin V/PI staining assay. Alternatively mitochondria-free cytosolic fractions were isolated as described in Methods, and subjected to Western blot analysis to monitor the release of cytochrome c and AIF into the cytosol (B). (C) U937 cells were exposed to sorafenib (7.5  $\mu\text{M}$ ) and HA14-1 (10  $\mu\text{M}$ ) alone or in combination for 6 h or 24 h after which protein lysates were prepared and subjected to Western blot analysis. (D) Median Dose Effect analysis of cell death induction by sorafenib and HA14-1. U937 cells were exposed to varying concentrations of sorafenib and HA14-1 at a fixed ratio (1:1), for 24 h after which the extent of cell death was monitored with the annexin V/PI assay. Combination Index (C.I.) values were determined in relation to the Fractional Effect using a commercially available software program as described in Methods. C.I. values  $< 1.0$  correspond to a synergistic interaction. (E) U937 cells were exposed to 7.5  $\mu\text{M}$  sorafenib and 7.5  $\mu\text{M}$  gossypol alone or in combination for 24 h after which the percentage of apoptotic cells was determined by the

Annexin V/PI assay. \* = significantly greater than values for obatoclast or gossypol alone;  $P < 0.02$ .

**Supplemental Figure 3: Knock-down of Bax or Bak, or over-expression of Mcl-1 significantly protects cells against sorafenib and obatoclast lethality.** U937 cells in which Bak (shBak) or Bax (shBax) were stably knocked down using shRNA and their control counterpart GFP (shGFP) cells were exposed to the designated concentrations of sorafenib (**A**) or obatoclast (**B**) for 48 h, after which the extent of cell death was determined using the 7-AAD assay. \* = significantly less than values for shGFP controls;  $P < 0.05$ . U937 cells ectopically expressing Mcl-1 and their empty vector control cells (pCEP4) were treated with the designated concentrations of sorafenib (**C**) or obatoclast (**D**) for 48 h, after which the extent of cell death was determined using the 7-AAD staining assay. \* = significantly less than values for pCEP4 controls;  $P < 0.05$ ; \*\* =  $P < 0.02$ .

**Supplemental Figure 4: Bim knock down significantly protects and Bim overexpression markedly enhances sorafenib/obatoclast lethality.** (**A**) MV4-11 cells were infected with lentiviruses carrying pLK01 Bim-shRNA constructs (cat# RHS3979-9569482; open Biosystems) and selected in the presence of puromycin for 1 week, after which Bim expression was monitored by western blot analysis and compared with negative control cells (NC) infected with a scrambled shRNA construct. Alternatively, these cells were exposed to sorafenib and obatoclast alone or in combination for 24 h after which cell death was assessed by 7-AAD assay (**B**). \* = significantly less than values for NC cells;  $P < 0.02$ . (**C**) U937 cells ectopically expressing wild type Bim (Bim wt) or their empty vector counterparts (pcDNA3.1) were treated with sorafenib (7.5  $\mu\text{M}$ ) and obatoclast (1.5  $\mu\text{M}$ ) alone and in combination for 24 h, after which protein lysates were prepared and subjected to Western blot analysis to monitor caspase-3 and PARP cleavage. Blots were stripped and re-probed with antibodies directed against tubulin to ensure equivalent loading and transfer.

**Supplemental Figure 5: Autophagy plays a cytoprotective role against sorafenib/obatoclast lethality** (**A**) MV4-11 cells were stably transfected with LC3-EGFP using lentiviral transduction. Cells were then exposed to sorafenib and obatoclast alone or in combination for 6 h, after which

cells were fixed and subjected to confocal microscopy. **(B)** Enlarged images of outlined areas of the Figure 6C illustrating co-localization of LC3-GFP (Green) and LAMP1 (red) in U937 cells following 6-h treatment with sorafenib (7.5  $\mu$ M) and obatoclox (1.5  $\mu$ M). **(C)** U937 cells were treated with sorafenib (7.5  $\mu$ M) and obatoclox (1.5  $\mu$ M) alone or in combination for 6-24 h, after which protein lysates were prepared and subjected to Western blot analysis to monitor p62 protein levels. **(D)** U937 cells were pretreated with 3-MA (2.5 mM) or Bafilomycin A1 (Baf; 75 nM) for 30 min, and exposed to sorafenib (7.5  $\mu$ M) or obatoclox (1.5  $\mu$ M) alone for an additional 16 h, after which the extent of cell death was monitored by the 7-AAD assay. **(E)** HL-60 cells were pretreated with 3-MA (4 mM), chloroquine (CQ; 50  $\mu$ M), or Bafilomycin A1 (100 nM) for 30 min, and exposed to sorafenib (7.5  $\mu$ M) and obatoclox (2  $\mu$ M) alone or in combination for an additional 28 h, after which the extent of cell death was monitored by the 7-AAD assay. Values represent the means  $\pm$  S.D. for triplicate determinations performed on three separate occasions. \* = significantly greater than values obtained in the absence of CQ, Baf, or 3MA;  $P < 0.02$ . Alternatively, after treatment as in **(E)**, cells were lysed and Western blot analysis performed to monitor expression of cleaved caspase-3, PARP degradation, and expression of LC3-II **(F)**. **(G)** U937 cells were exposed to 7.5  $\mu$ M sorafenib  $\pm$  1.5  $\mu$ M obatoclox in the presence or absence of 50  $\mu$ M chloroquine for 6 h, after which cells were lysed and subjected to Western blot analysis to monitor LC3-II and PARP cleavage.

**Supplemental Figure 6: Bim knock-down is associated with increased LC3 processing.** U937 cells in which Bim was stably knocked down using lentivirus-mediated shRNA as in Supplemental Figure 4A and their control counterparts (NC) were exposed to sorafenib and obatoclox for 6 h, after which proteins were extracted and subjected to Western blot analysis to monitor expression of LC3-II and Bim.

**Supplemental Figure 7: Exposure to sorafenib/obatoclox does not result in weight loss and minimally reduces white and red blood cell counts in xenograft-bearing mice.** **(A)** Nude mice were injected with luciferase-expressing U937 cells, treated with sorafenib (80 mg/kg) and obatoclox (3.5 mg/kg) alone or together as described in Methods for the designated intervals, and imaged using the IVIS 200 imaging system. X marks correspond to deceased mice. **(B)** U937 xenograft-bearing nude mice were treated with sorafenib and obatoclox alone or in combination

for the designated intervals after which animal body weights were measured and represented as a percentage of animal weight before treatment. Alternatively white and red blood cells counts were determined after 1 week of treatment using a Coulter counter and presented as a percentage of control values (C).

# Supplemental Figure 1

## A

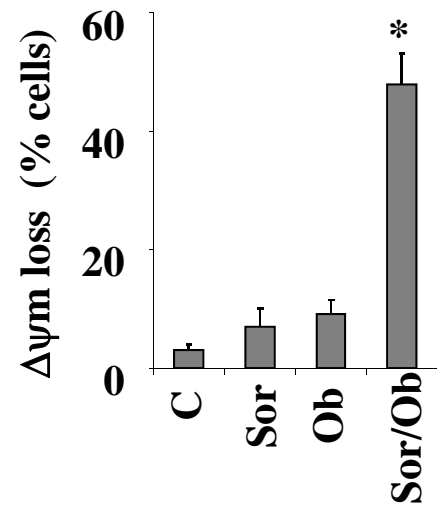

## B

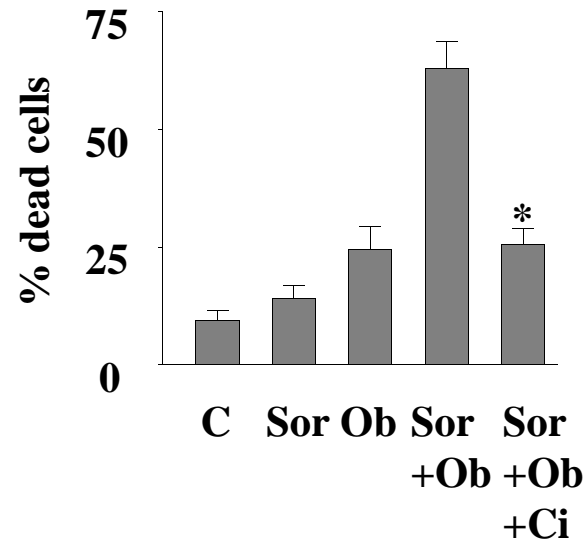

## C

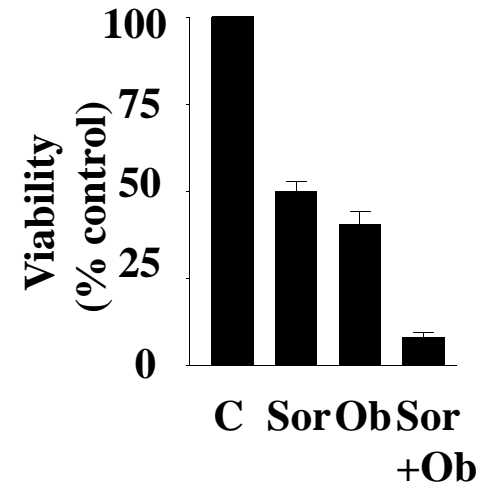

## Supplemental Figure 2

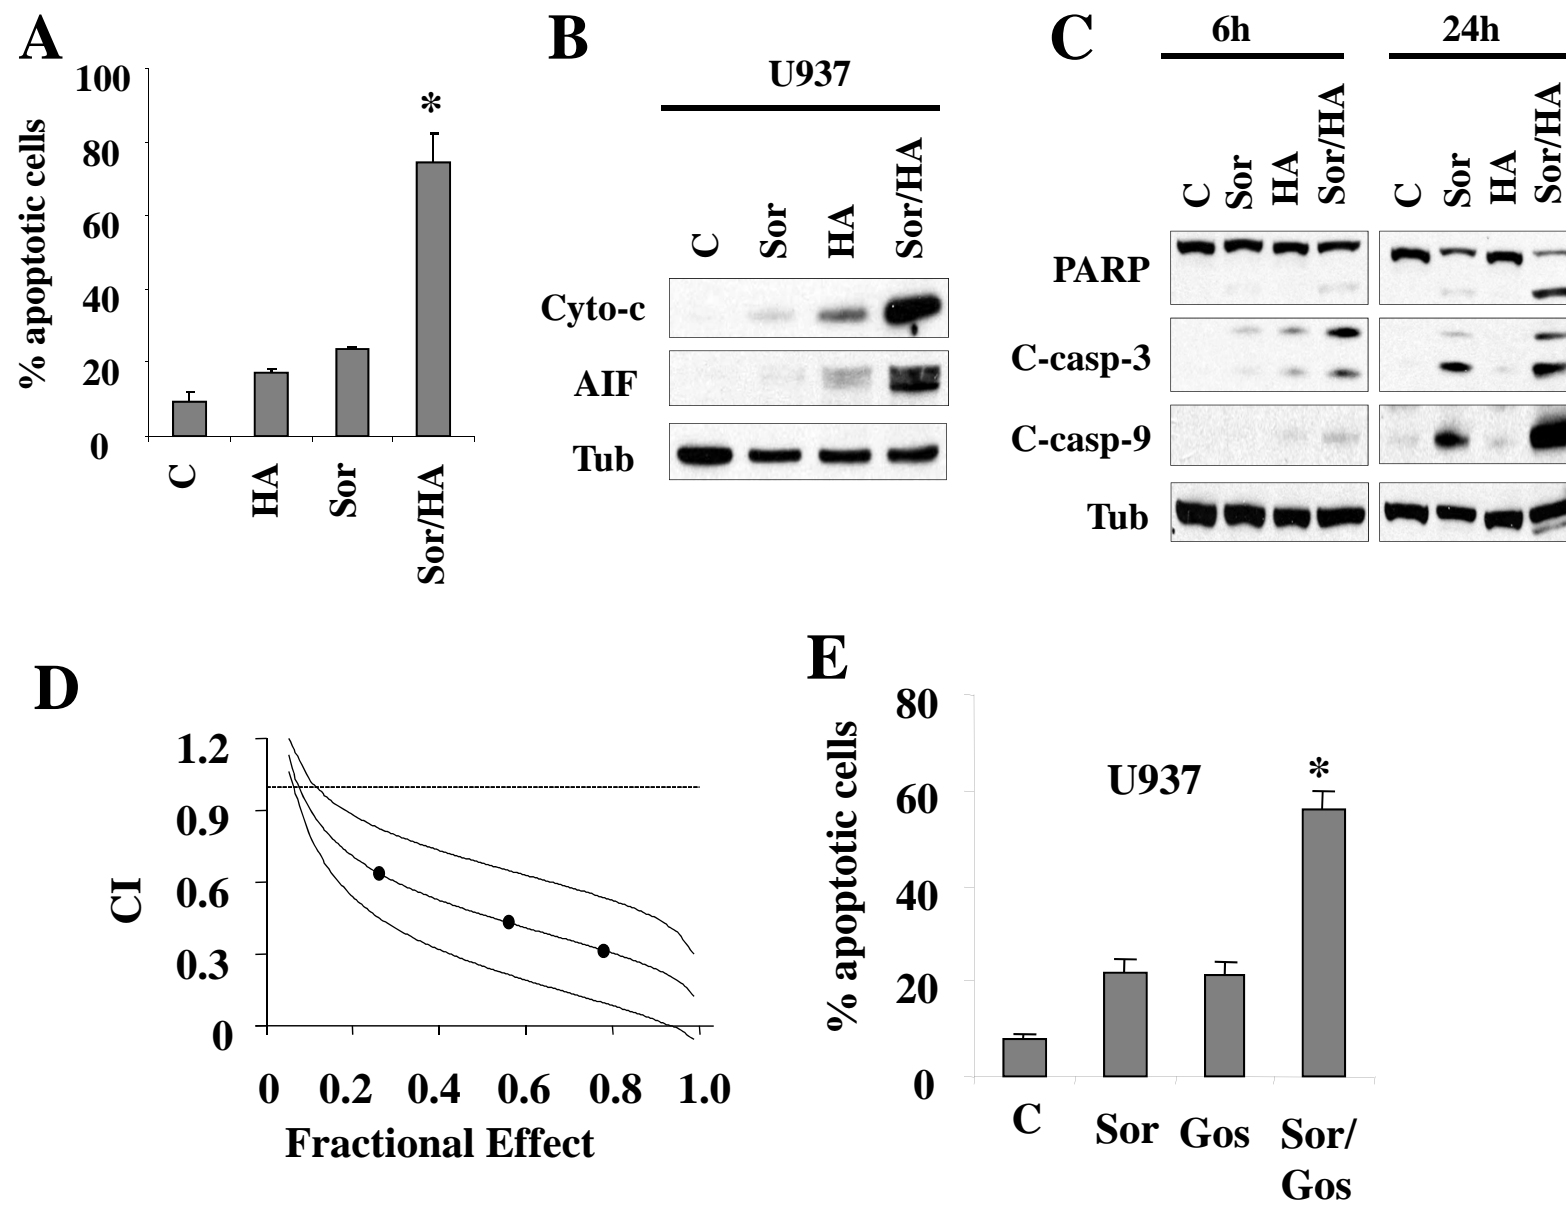

### Supplemental Figure 3

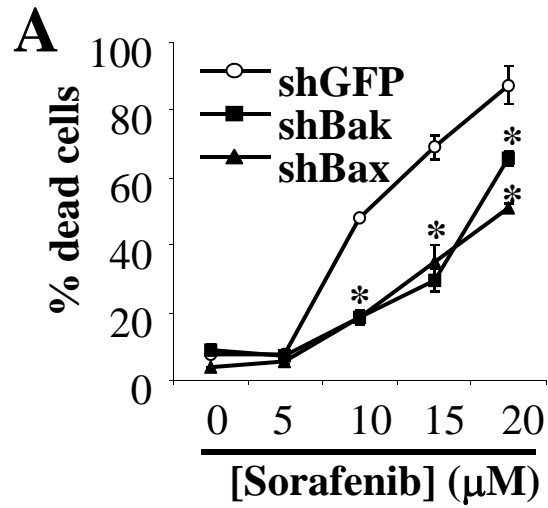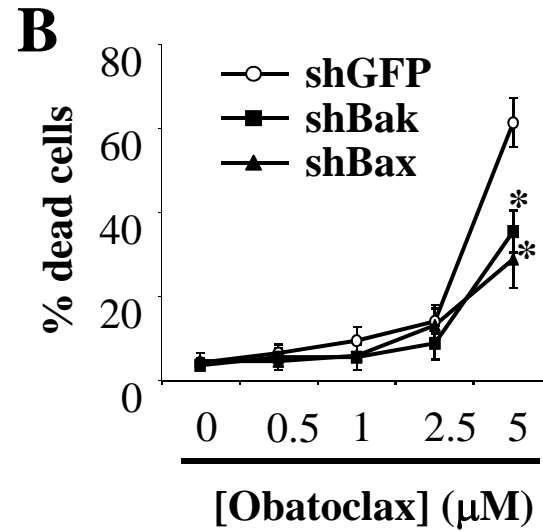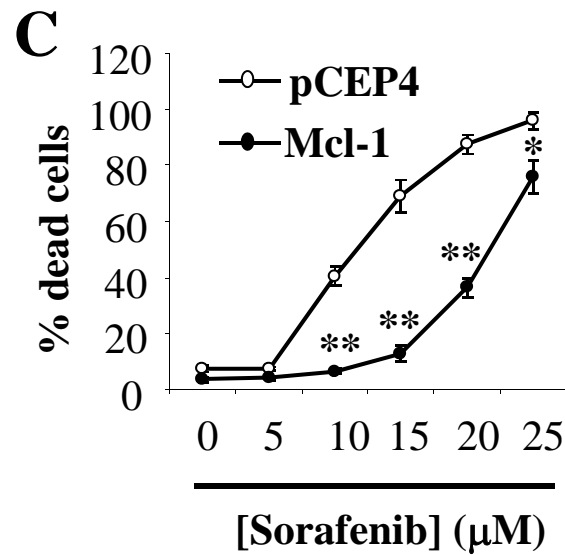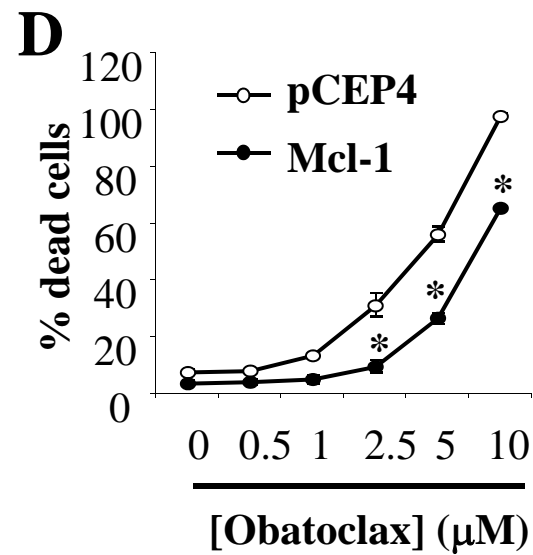

# Supplemental Figure 4

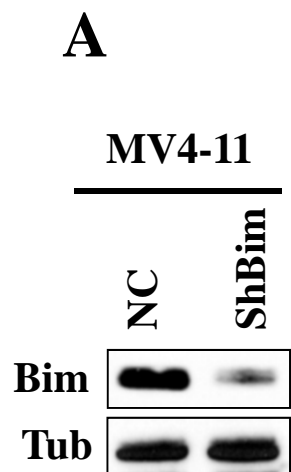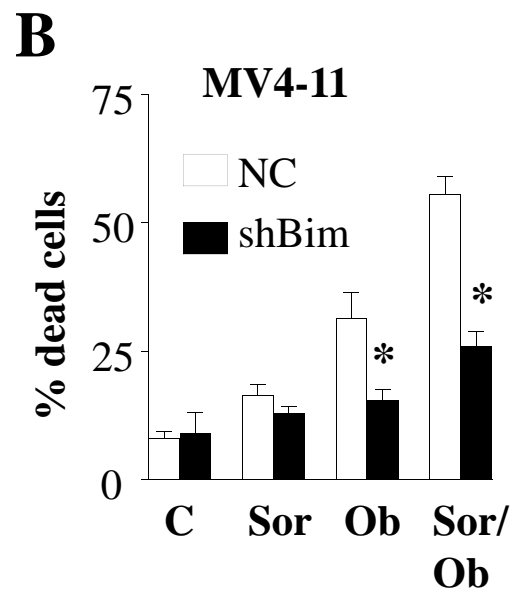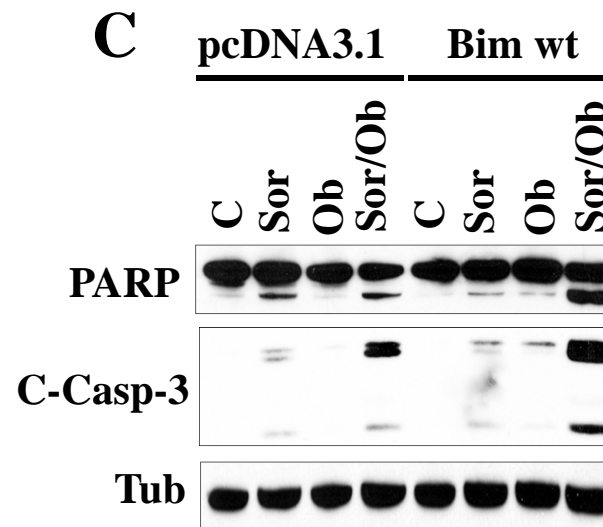



Supplemental Figure 5

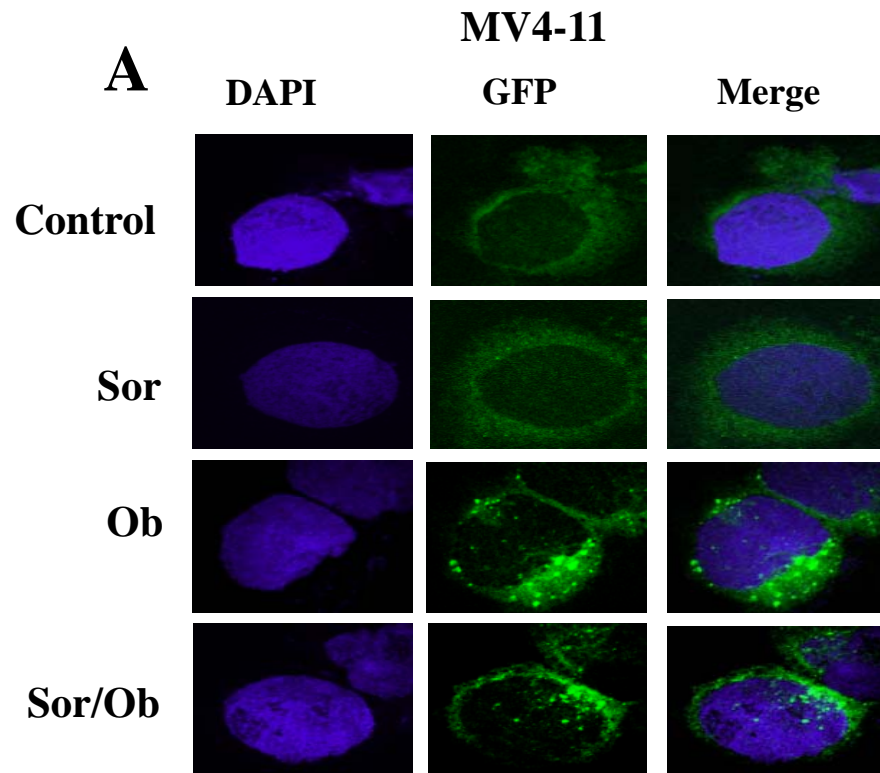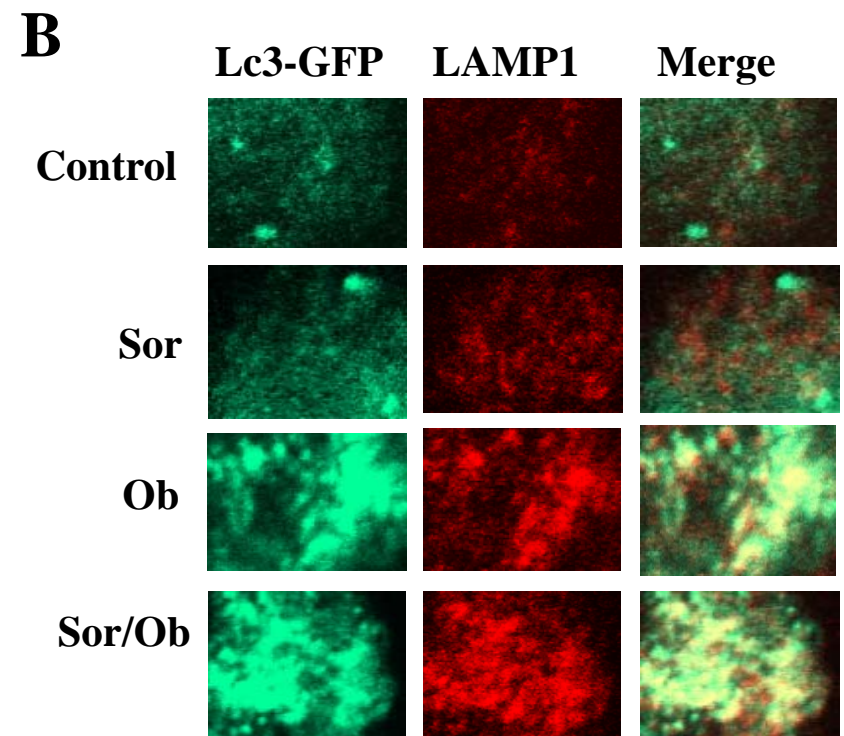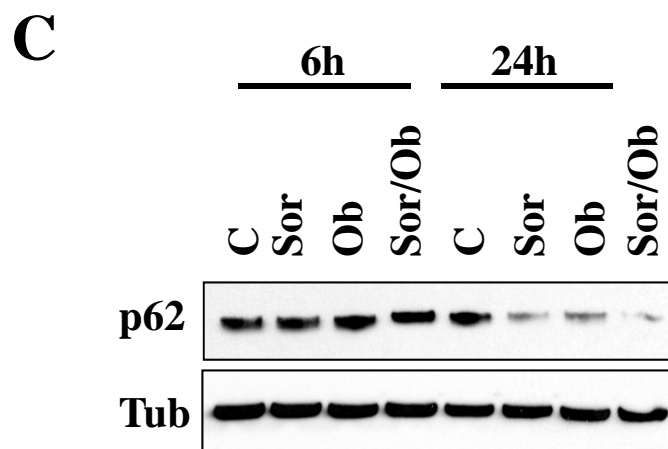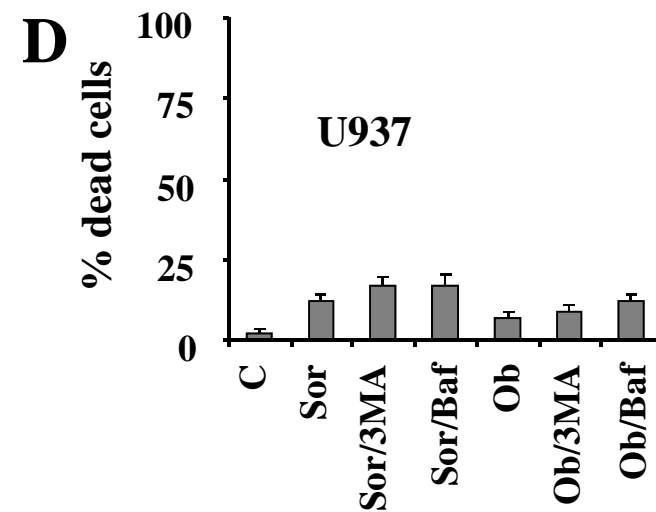

Supplemental Figure 5 (continued)

**E**

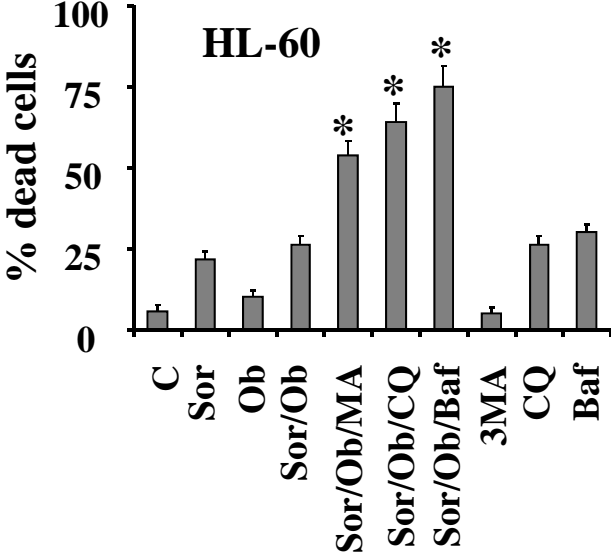

**F**

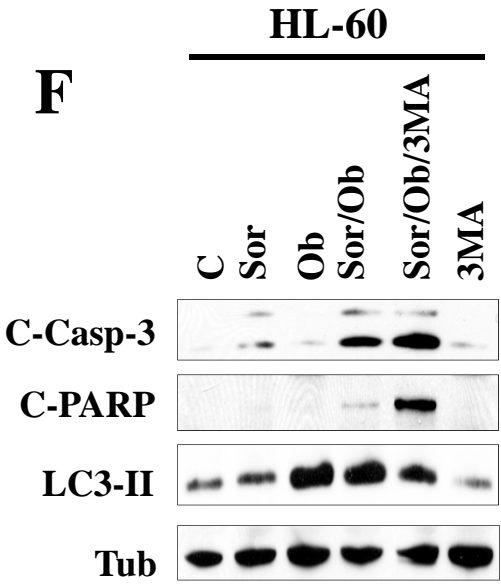

**G**

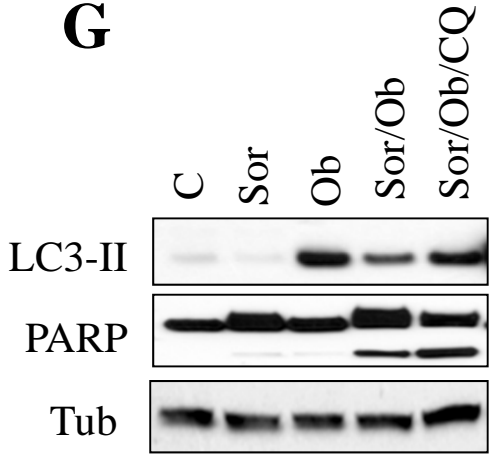



Supplemental Figure 7

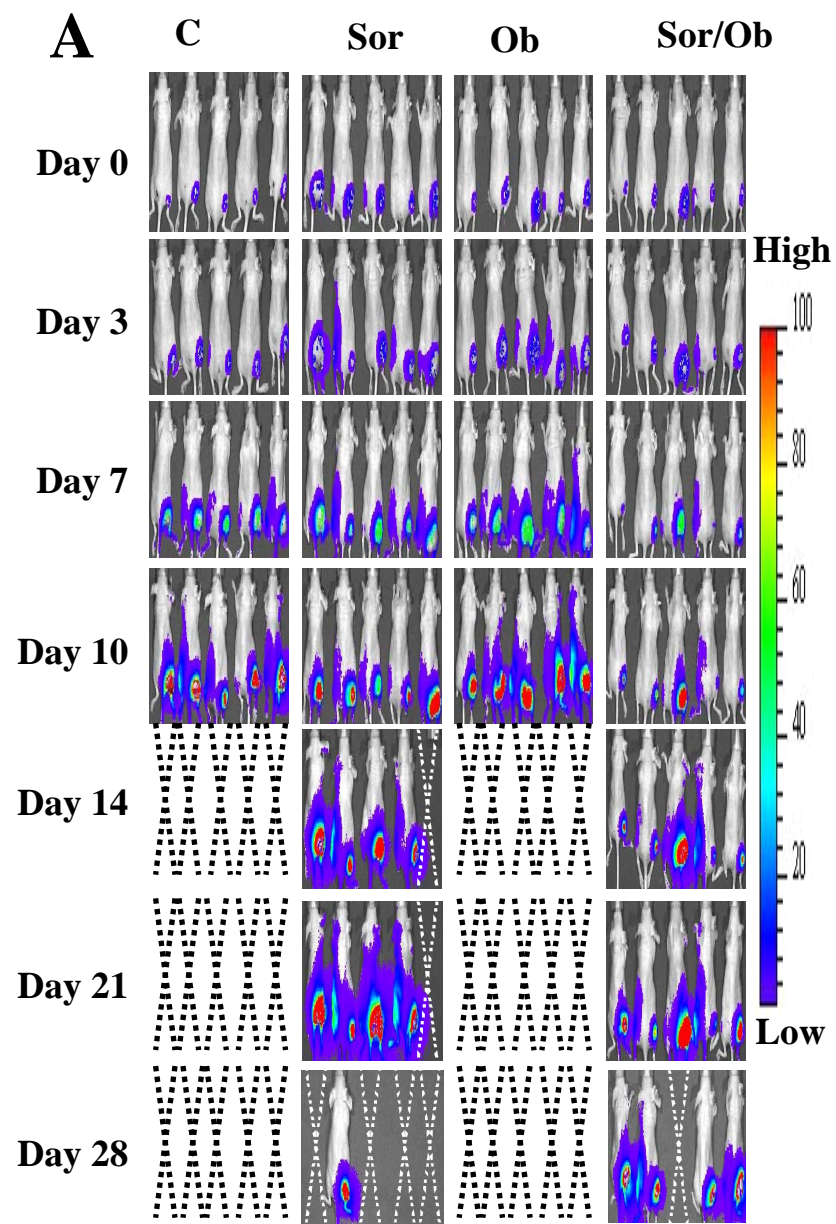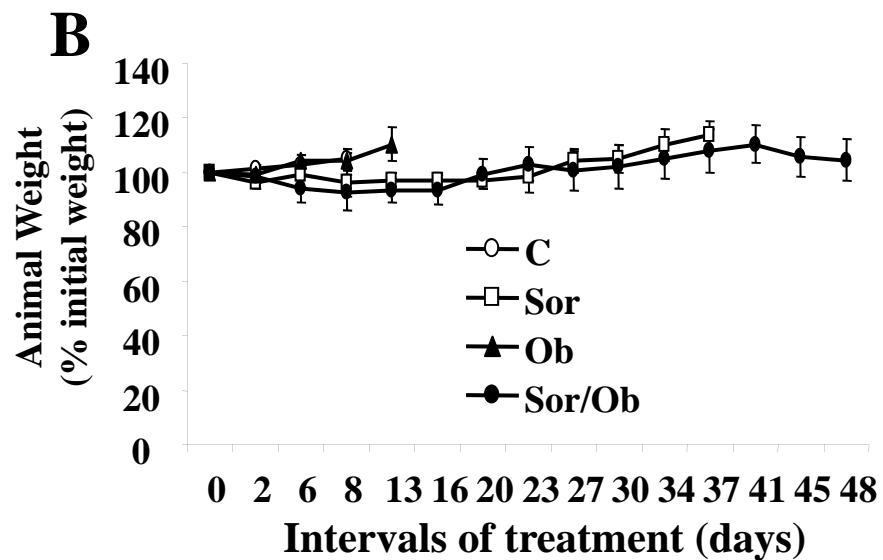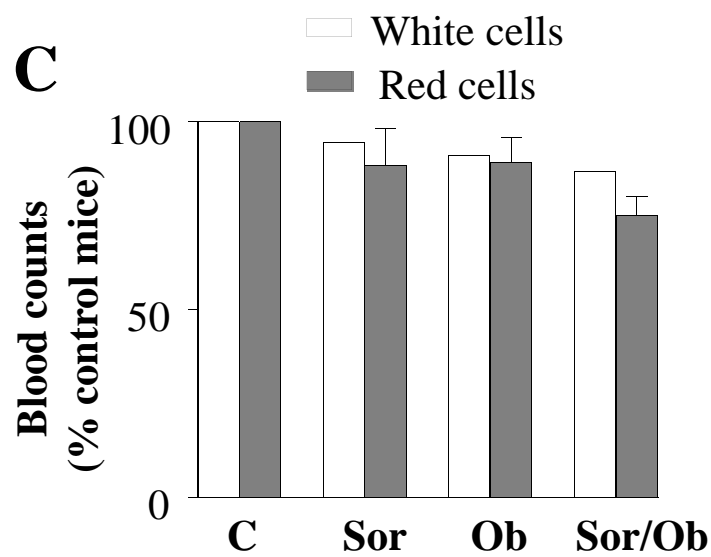

Supplement: supp_blood-2011-09-378141_blood-2011-09-378141-1.pdf [file supp_blood-2011-09-378141_blood-2011-09-378141-1.pdf]
